# Supplementary material for: Enhancing the Conservation of Crop Wild Relatives in England
Source: PLoS One. 2015 Jun 25;10(6):e0130804. doi: 10.1371/journal.pone.0130804 (PMC4481409; doi:10.1371/journal.pone.0130804)
Supplement: S1 Table — The criteria for each priority level and the recommended actions associated with each are also listed. (XLSX) [file pone.0130804.s003.xlsx]

## Sheet: Priority Levels & Actions
In situ
Priority Level	Criteria	Action required
1	Poorly represented in protected areas (Less than five protected areas contain five or more occurrence records of the CWR)	Assess and improve conservation urgently; Carry out survey of populations across England to find full extent if not already known; Where occurrences do exist in protected areas, add into management plan urgently and assess how appropriate current management is in maintaining their population sizes and range of genetic diversity; If occurrences are outside of protected areas, establish conservatio…
2	Poorly represented in SSSIs but well represented in other protected areas (Less than five SSSIs contain five or more occurrence records of the CWR but five or more other protected areas contain at least five occurrence records)	Include CWR in protected area management plans and assess whether existing management is appropriate to conserve them; Adjust management plans accordingly where necessary
3	Well represented in SSSIs (Five or more SSSIs contain at least five occurrence records of the CWR)	Include CWR on SSSI management plan and assess whether existing management is appropriate to conserve them; Adjust management plans accordingly where necessary
Ex situ
Priority Level	Criteria	Action required
1	No accessions	Highest priority for collection; Ensure minimum of five accessions are collected representing the full range of the CWR
2	Has accessions but none are georeferenced or the location data is restricted	High priority for collection; Georeference existing accessions; Further collection of accessions which are representative of CWR range required
3	Fewer than five accessions and GRS lower than 30%	Increase accessions to a minimum of five; ensure representative of range
4	Fewer than five accessions but GRS greater than 30%	Increase accessions to a minimum of five; confirm that current stored accessions are representative of CWR range
5	Greater than or equal to five accessions but GRS lower than 30%	Improve geographic representativeness of accessions through further targeted collection
6	Greater than or equal to five accessions and GRS greater than 30%	Sufficiently represented in ex situ collections
CWR on NERC S41 List	Ensure suggested priority actions under the NERC S41 list are urgently carried out
Protected areas
SSSI
SAC
NNR
LNR
AONB
National Park
Country Park
Biosphere reserve
SPA
Ramsar

## Sheet: Conservation Priorities
Priority CWR	In situ category	Ex situ Category	NERC S41 List
Pyrus cordata Desv.	1	6	✓
Beta vulgaris L. subsp. maritima (L.) Arcang.	3	5
Daucus carota L. subsp. carota	3	5
Festuca arundinacea Schreb.	3	5
Festuca gigantea (L.) Vill.	3	5
Festuca pratensis Huds.	3	5
Fragaria vesca L.	3	5
Lactuca serriola L.	3	5
Lathyrus pratensis L.	3	5
Linum catharticum L.	3	5
Lolium perenne L.	3	5
Lotus corniculatus L.	3	5
Medicago lupulina L.	3	5
Trifolium arvense L.	3	5
Trifolium pratense L.	3	5
Trifolium repens L.	3	5
Vicia hirsuta (L.) Gray	3	5
Brassica oleracea L.	2	5
Lactuca virosa L.	2	5
Raphanus raphanistrum L. subsp. maritimus (Sm.) Thell.	2	5
Rubus caesius L.	2	5
Lactuca saligna L.	1	5	✓
Linum perenne L. subsp. anglicum (Mill.) Ockendon	1	5
Allium sphaerocephalon L.	1	4
Allium ursinum L.	3	3
Allium vineale L.	3	3
Anthoxanthum odoratum L.	3	3
Brassica nigra (L.) W.D.J Koch	3	3
Capsella bursa-pastoris (L.) Medik.	3	3
Chenopodium album L.	3	3
Dactylis glomerata L.	3	3
Erodium cicutarium (L.) L'Hér.	3	3
Holcus lanatus L.	3	3
Hordeum marinum Huds.	3	3	✓
Lotus pedunculatus Cav.	3	3
Malus sylvestris (L.) Mill.	3	3
Medicago minima (L.) Bartal.	3	3
Ornithopus perpusillus L.	3	3
Phalaris arundinacea L.	3	3
Phleum pratense L.	3	3
Prunus avium (L.) L.	3	3
Prunus padus L.	3	3
Prunus spinosa L.	3	3
Ribes rubrum L.	3	3
Rubus chamaemorus L.	3	3
Rubus idaeus L.	3	3
Sinapis arvensis L.	3	3
Trifolium fragiferum L.	3	3
Trifolium glomeratum L.	3	3
Trifolium squamosum L.	3	3
Trifolium suffocatum L.	3	3
Trisetum flavescens (L.) P. Beauv	3	3
Vaccinium myrtillus L.	3	3
Vaccinium oxycoccos L.	3	3
Vicia lathyroides L.	3	3
Allium oleraceum L.	2	3
Apium graveolens L.	2	3
Chenopodium bonus-henricus L.	2	3
Cichorium intybus L.	2	3
Lathyrus sylvestris L.	2	3
Medicago polymorpha L.	2	3
Prunus domestica L. subsp. insititia (L.) Bonnier & Layens	2	3
Ribes alpinum L.	2	3
Trifolium subterraneum L.	2	3
Vicia lutea L.	2	3
Allium ampeloprasum L.	1	3
Allium schoenoprasum L.	1	3
Chenopodium glaucum L.	1	3
Chenopodium hybridum L.	1	3
Chenopodium murale L.	1	3
Chenopodium vulvaria L.	1	3	✓
Daucus carota L. subsp. gummifer (Syme) Hook. f.	1	3
Medicago sativa L. subsp. falcata (L.) Arcang.	1	3
Ribes spicatum E. Robson	1	3
Trifolium bocconei Savi	1	3
Trifolium ochroleucon Huds.	1	3
Trifolium strictum L.	1	3
Vicia parviflora Cav.	1	3
Chenopodium chenopodioides (L.) Aellen	3	2
Vaccinium vitis-idaea L.	3	2
Vicia sativa L. subsp. nigra (L.) Ehrh.	3	2
Asparagus prostratus Dumort.	2	2	✓
Trifolium striatum L.	2	2
Agrostis canina L.	3	1
Agrostis capillaris L.	3	1
Agrostis curtisii Kerguélen	3	1
Alopecurus geniculatus L.	3	1
Alopecurus pratensis L.	3	1
Apium inundatum (L.) Rchb.f.	3	1
Arrhenatherum elatius (L.) P. Beauv. ex J. & C. Presl	3	1
Atriplex portulacoides L.	3	1
Calamagrostis epigejos (L.) Roth	3	1
Chenopodium polyspermum L.	3	1
Chenopodium rubrum L.	3	1
Corylus avellana L.	3	1
Cynosurus cristatus L.	3	1
Hordeum secalinum Schreb.	3	1
Koeleria macrantha (Ledeb.) Schult.	3	1
Lathyrus linifolius (Reichard) Bässler	3	1
Medicago arabica (L.) Huds.	3	1
Phleum bertolonii DC.	3	1
Poa annua L.	3	1
Poa pratensis L.	3	1
Poa trivialis L.	3	1
Potentilla palustris (L.) Scop.	3	1
Rorippa amphibia (L.) Besser	3	1
Rorippa nasturtium-aquaticum (L.) Hayek	3	1
Trifolium campestre Schreb.	3	1
Trifolium medium L.	3	1
Trifolium occidentale Coombe	3	1
Trifolium ornithopodioides L.	3	1
Trifolium scabrum L.	3	1
Vicia cracca L.	3	1
Vicia sativa L. subsp. segetalis (Thuill.) Gaudin	3	1
Vicia sepium L.	3	1
Agrostis gigantea Roth.	2	1
Allium scorodoprasum L.	2	1
Atriplex glabriuscula Edmondston	2	1
Brassica rapa L. subsp. campestris (L.) A.R. Clapham	2	1
Chenopodium ficifolium Sm.	2	1
Hordeum murinum L. subsp. murinum	2	1
Lepidium heterophyllum Benth.	2	1
Linum bienne Mill.	2	1
Melilotus altissimus Thuill.	2	1
Poa nemoralis L.	2	1
Prunus domestica L. subsp. domestica	2	1
Raphanus raphanistrum L. subsp. raphanistrum	2	1
Rorippa sylvestris (L.) Besser	2	1
Rubus saxatilis L.	2	1
Vicia sylvatica L.	2	1
Vicia tetrasperma (L.) Schreb.	2	1
Asparagus officinalis L.	1	1
Chenopodium urbicum L.	1	1	✓
Diplotaxis tenuifolia (L.) DC.	1	1
Festuca ovina L. subsp. hirtula (Hack. ex Travis) M.J. Wilk.	1	1
Festuca ovina L. subsp. ophioliticola (Kerguélen) M.J. Wilk.	1	1
Festuca ovina L. subsp. ovina	1	1
Medicago sativa L. subsp. varia (Martyn) Arcang.	1	1
Pastinaca sativa L. subsp. sylvestris (Mill.) Rouy & E. G. Camus	1	1
Pastinaca sativa L. subsp. urens (Req. ex Godr.) Čelak.	1	1
Phleum alpinum L.	1	1
Prunus domestica L. subsp. italica (Borkh.) Gams ex Hegi	1	1
Sinapis alba L. subsp. alba	1	1
Trifolium incarnatum L. subsp. molinerii (Balb. ex Hornem.)	1	1
Vaccinium microcarpum (Turcz. ex Rupr.)	1	1
Vaccinium uliginosum L.	1	1
Vicia bithynica (L.) L.	1	1
Vicia orobus DC.	1	1
